# Supplementary material for: Meteorological drought projections for Australia from downscaled high-resolution CMIP6 climate simulations
Source: Copernicus journal article supplement (doi:10.5194/egusphere-2024-2341), 2024-07-29
Supplement: Supplementary file 1 [file egusphere-2024-2341-supplement.pdf]

1 **Meteorological drought projections for Australia from downscaled**  
2 **high-resolution CMIP6 climate simulations**

3 Rohan Eccles<sup>1\*</sup>, Ralph Trancoso<sup>1,2</sup>, Jozef Syktus<sup>2</sup>, Sarah Chapman<sup>1</sup>, Nathan Toombs<sup>1</sup>, Hong Zhang<sup>1</sup>,  
4 Shaoxiu Ma<sup>1</sup>, Ryan McGloin<sup>1</sup>

5 <sup>1</sup>*Climate Projections and Services, Department of Energy and Climate, Queensland Government, Brisbane,*  
6 *Australia*

7 <sup>2</sup>*School of The Environment, The University of Queensland, Brisbane, Australia*

8

9 **Supplementary Material**

10 This supplementary material contains Fig. S1 to Fig. S17.

11

12 **1 Goodness of fit**

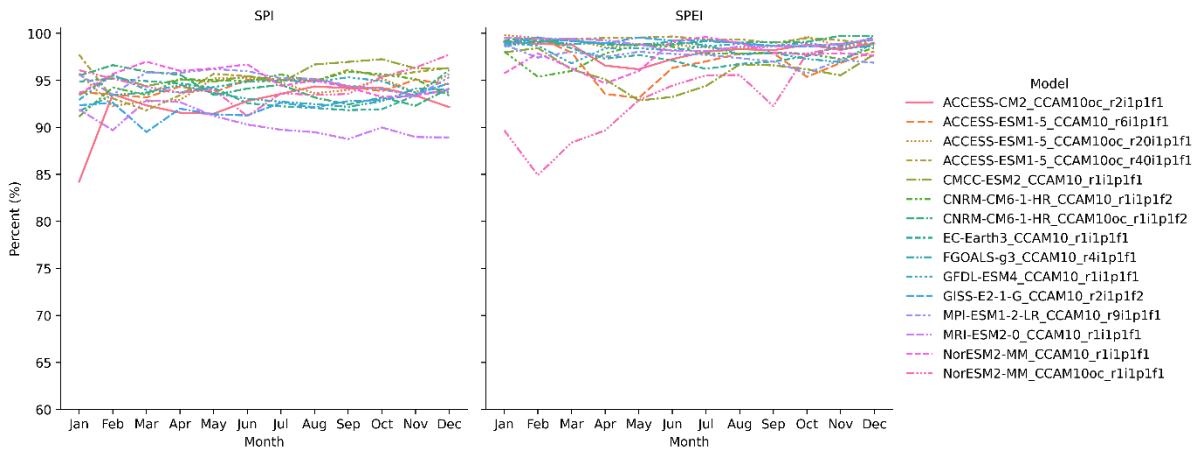

13  
 14 **Figure S1.** Percentage of cells which pass the Shapiro-Wilk test at the 95% confidence level for normality following  
 15 application of the Gamma distribution for SPI and the Log-logistic distribution for SPEI. Each month is fitted  
 16 separately using data in the calibration period (1981-2010).  
 17

18 2 Changes to SPI and SPEI

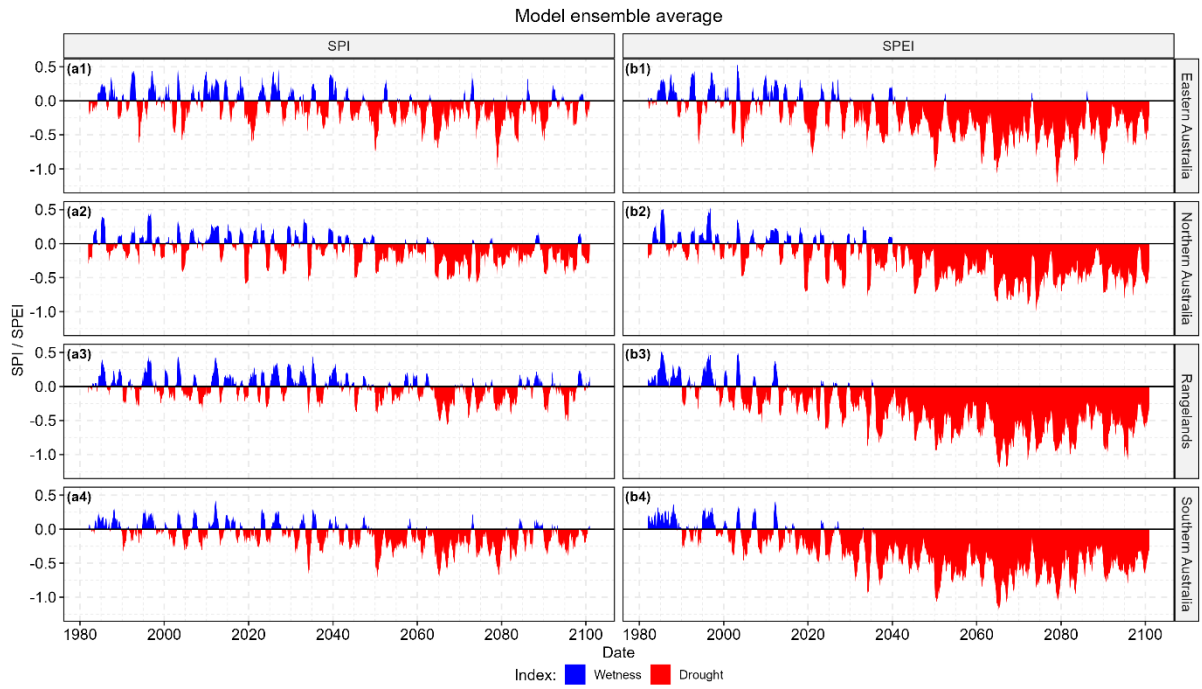

19  
20 **Figure S2.** Timeseries of the multi-model ensemble average SPI and SPEI results for the four NRM regions  
21 considered under SSP126.

22

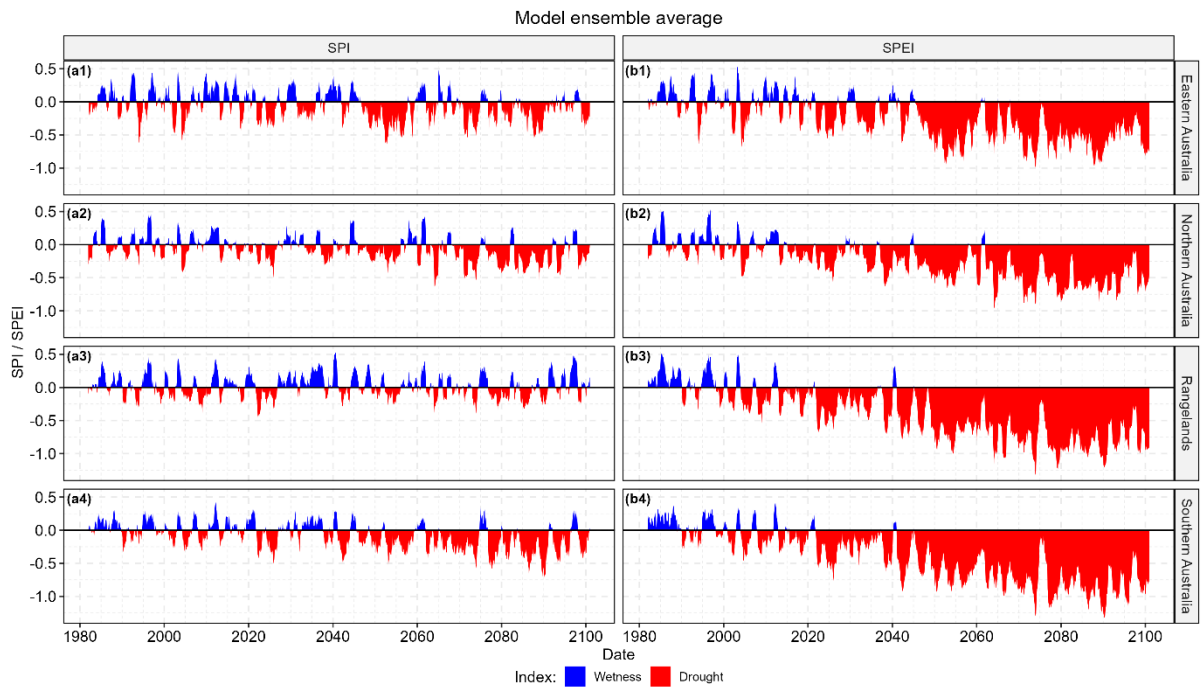

23  
24 **Figure S3.** Timeseries of the multi-model ensemble average SPI and SPEI results for the four NRM regions  
25 considered under SSP245.

26

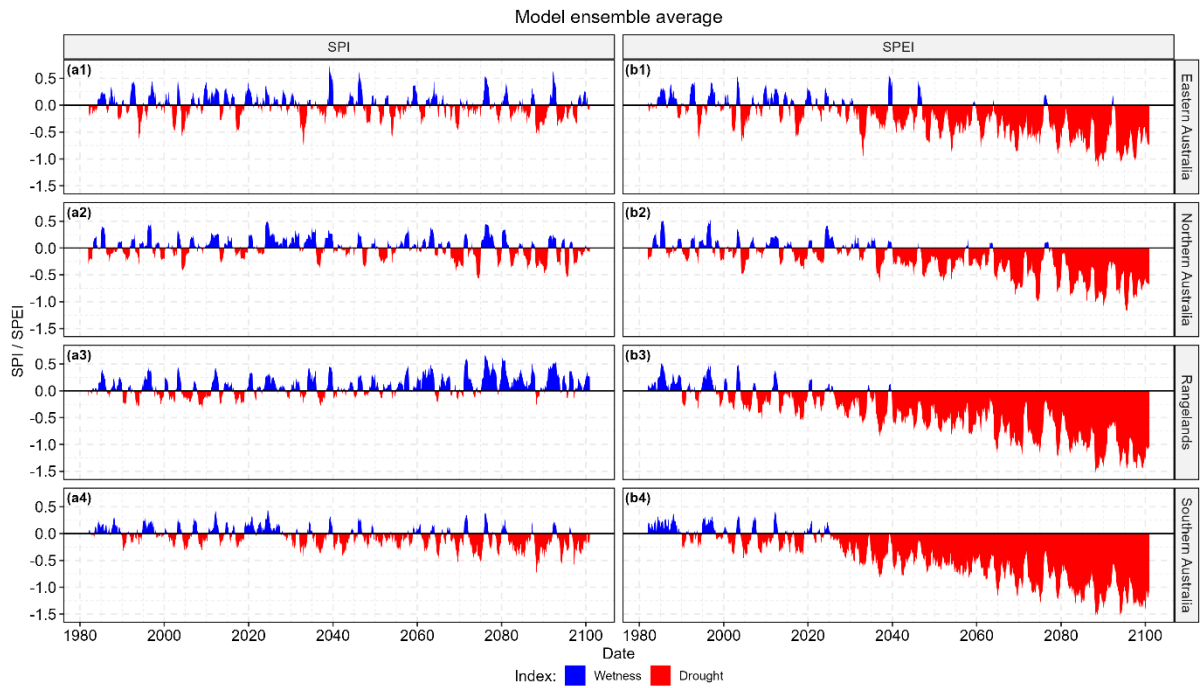

27  
28  
29

**Figure S4.** Timeseries of the multi-model ensemble average SPI and SPEI results for the four NRM regions considered under SSP370

30

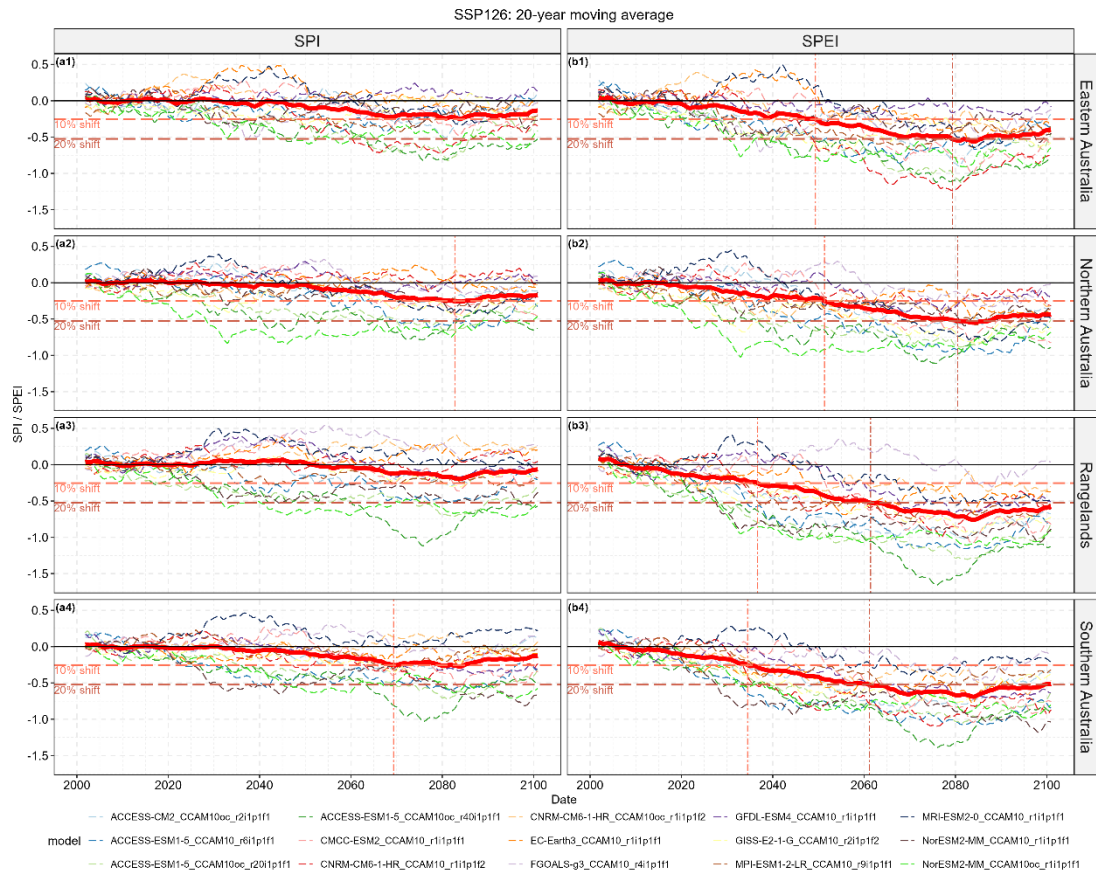

31  
32  
33  
34

**Figure S5.** Timeseries results for SPI and SPEI calculated as a 20-year moving average for each climate model considered with the model average shown in red for each of the regions under the SSP126 scenario. Dotted lines show the time taken for the ensemble average value to shift by 10% and 20% (according to the Z-score).

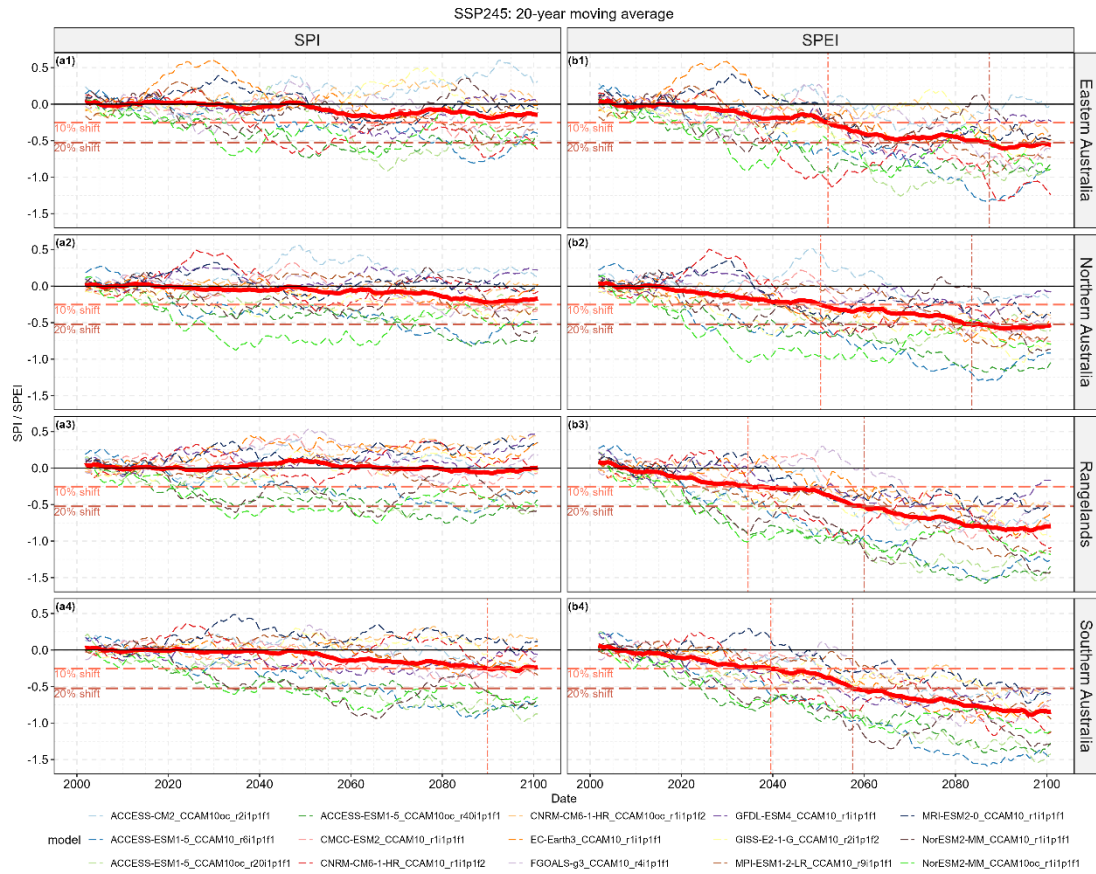

35  
 36 **Figure S6.** Timeseries results for SPI and SPEI calculated as a 20-year moving average for each climate model  
 37 considered with the model average shown in red for each of the regions under the SSP245 scenario. Dotted lines  
 38 show the time taken for the ensemble average value to shift by 10% and 20% (according to the Z-score).  
 39

40

41

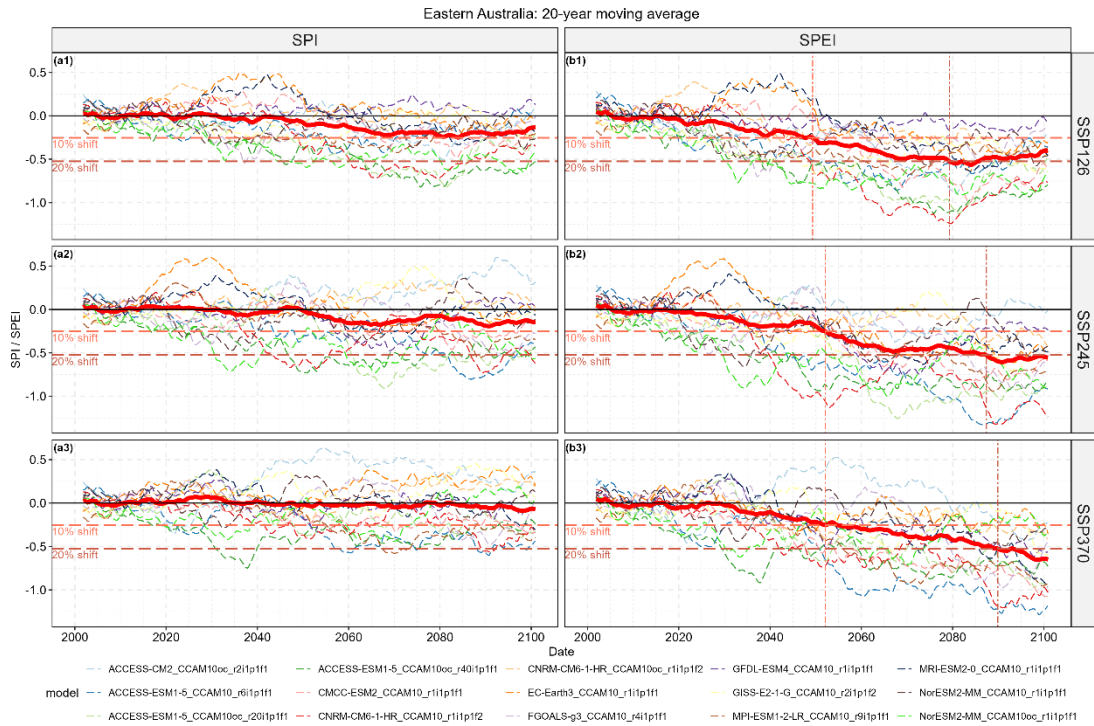

42  
 43 **Figure S7.** Timeseries results for SPI and SPEI calculated as a 20-year moving average for each climate model  
 44 considered with the ensemble average shown in red for each of the emissions scenarios for Eastern Australia.  
 45 Dotted lines show the time taken for the ensemble average value to shift by 10% and 20% (according to the Z-  
 46 score).

47

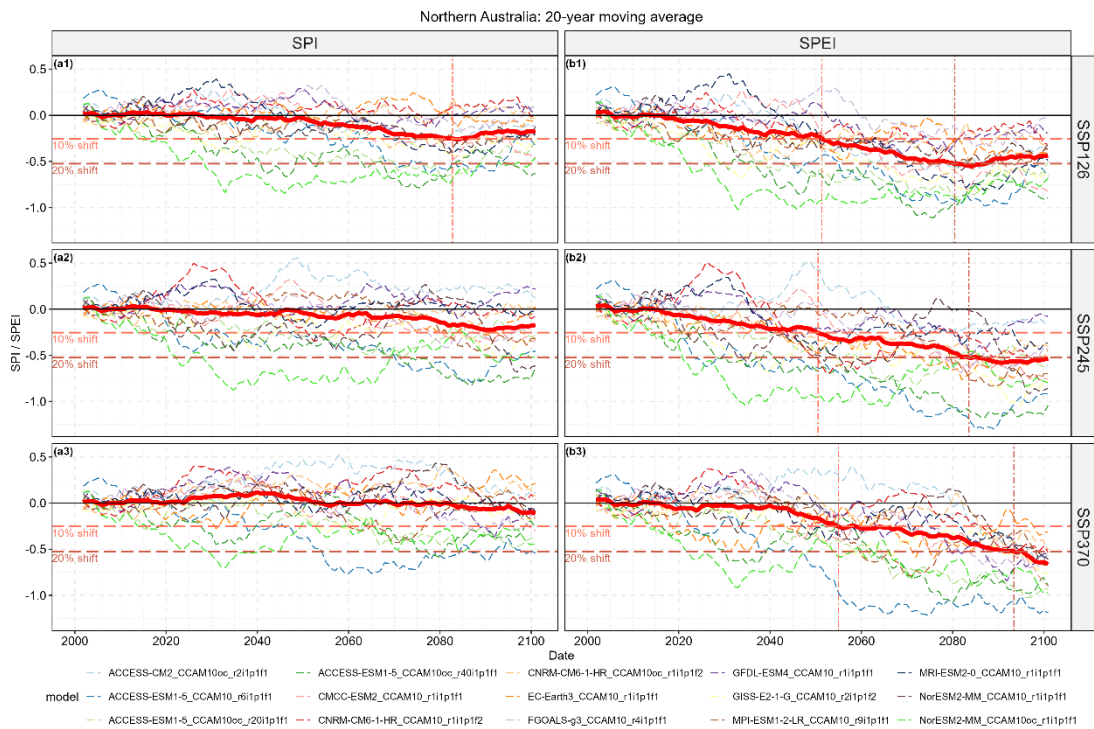

48  
 49 **Figure S8.** Timeseries results for SPI and SPEI calculated as a 20-year moving average for each climate model  
 50 considered with the ensemble average shown in red for each of the emissions scenarios for Northern Australia.  
 51 Dotted lines show the time taken for the ensemble average value to shift by 10% and 20% (according to the Z-  
 52 score).

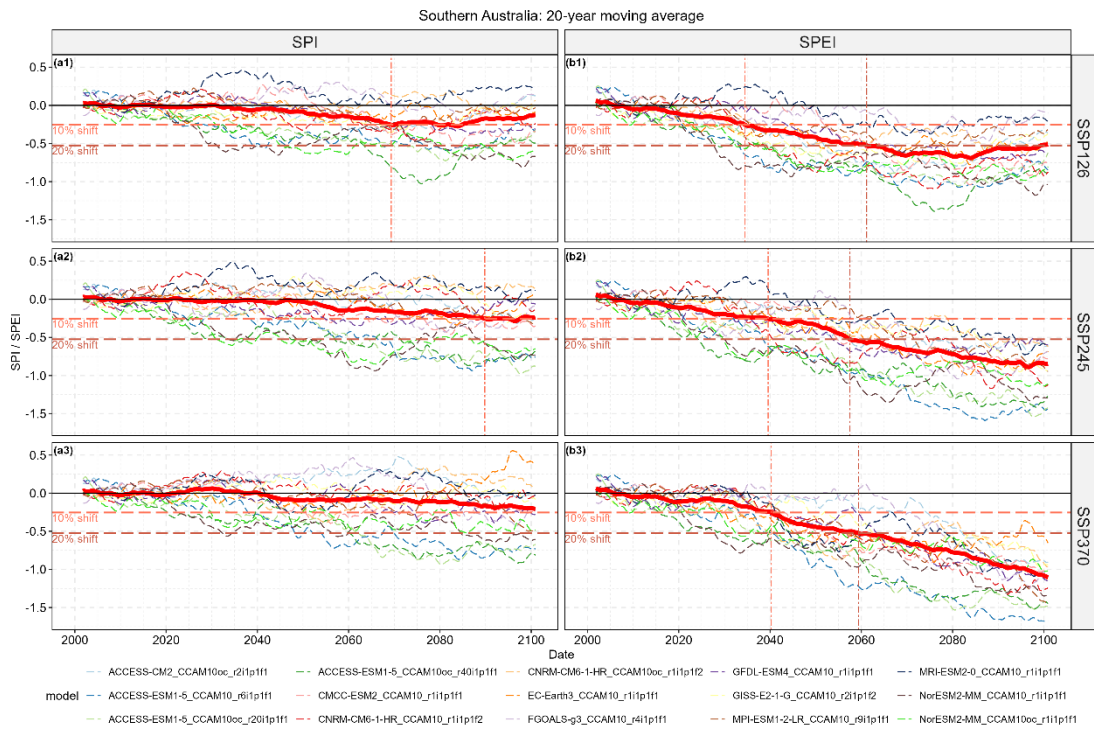

54  
 55  
 56  
 57  
 58  
 59  
 60

**Figure S9.** Timeseries results for SPI and SPEI calculated as a 20-year moving average for each climate model considered with the ensemble average shown in red for each of the emissions scenarios for Southern Australia. Dotted lines show the time taken for the ensemble average value to shift by 10% and 20% (according to the Z-score).

61 **3 Changes to drought extent**

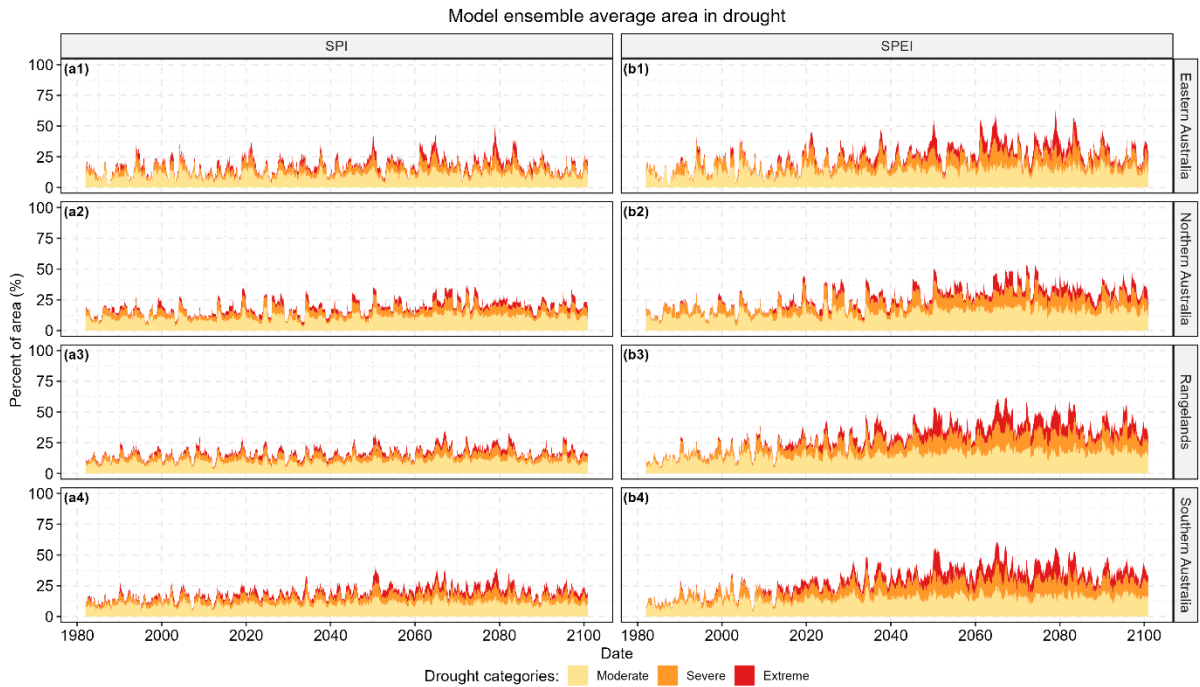

62  
63 **Figure S10.** Timeseries of the multi-model ensemble area in drought for SPI and SPEI results for the four NRM  
64 regions considered under SSP126.

65

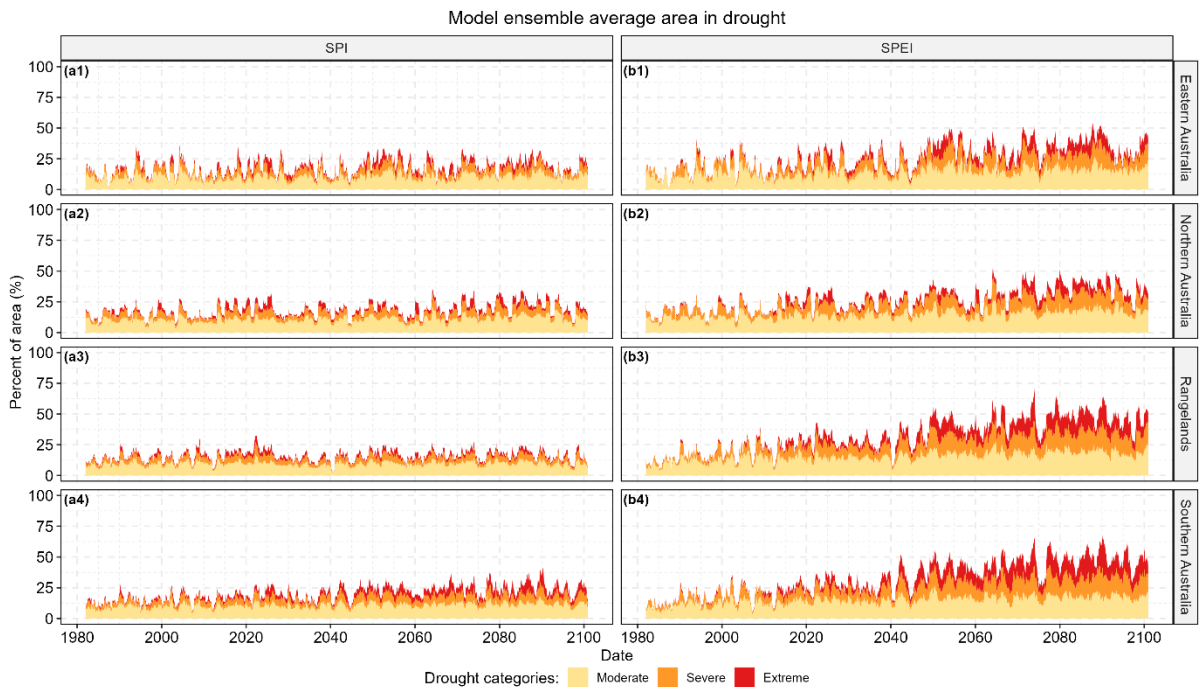

66  
67 **Figure S11.** Timeseries of the multi-model ensemble area in drought for SPI and SPEI results for the four NRM  
68 regions considered under SSP245.

69

70



71 Table S1. Projected absolute percent change to the percent of time spent in different drought and  
 72 wetness categories by the 2050s and 2090s compared to the reference period (1995-2014) using the  
 73 ensemble average under SSP245. Red colours denote larger increases, while green colours denote  
 74 decreases.

| Index | Category         | Eastern Australia |       | Northern Australia |       | Rangelands |        | Southern Australia |        |
|-------|------------------|-------------------|-------|--------------------|-------|------------|--------|--------------------|--------|
|       |                  | 2050s             | 2090s | 2050s              | 2090s | 2050s      | 2090s  | 2050s              | 2090s  |
| SPEI  | Extreme drought  | 1.86              | 1.65  | 0.74               | 1.77  | 0.55       | 0.46   | 2.97               | 4.05   |
|       | Severe drought   | 1.35              | 1.53  | 0.72               | 2.22  | 0.48       | 0.65   | 2.17               | 2.75   |
|       | Moderate drought | 1.26              | 1.53  | 0.76               | 3.1   | 0.08       | 0.55   | 1.71               | 2.55   |
|       | Near normal      | -0.38             | -1.27 | -0.53              | -4    | -1.9       | -2     | -6.17              | -7     |
|       | Moderate wetness | -2.5              | -2.13 | -1.22              | -2.4  | -0.45      | -1.01  | -1.35              | -2.27  |
|       | Severe wetness   | -1.28             | -1.08 | -0.67              | -0.94 | 0.06       | -0.1   | -0.3               | -0.81  |
|       | Extreme wetness  | -0.32             | -0.23 | 0.2                | 0.25  | 1.19       | 1.45   | 0.97               | 0.73   |
| SPEI  | Extreme drought  | 4.06              | 6.28  | 2.49               | 5.28  | 6.66       | 11.64  | 7.73               | 13.39  |
|       | Severe drought   | 3.73              | 6.04  | 3.45               | 6.69  | 6.1        | 9.36   | 6.04               | 9.16   |
|       | Moderate drought | 3.91              | 5.01  | 3.06               | 6.12  | 3.6        | 5.86   | 4.36               | 5.85   |
|       | Near normal      | -3.54             | -7.6  | -2.52              | -9.12 | -8.95      | -17.09 | -11.03             | -18.14 |
|       | Moderate wetness | -4.59             | -5.34 | -3.58              | -5.64 | -4.74      | -6.63  | -4.6               | -6.49  |
|       | Severe wetness   | -3.12             | -3.66 | -2.59              | -3.03 | -2.85      | -3.42  | -2.72              | -3.76  |
|       | Extreme wetness  | -0.6              | -0.97 | -0.34              | -0.42 | -0.05      | -0.25  | -0.04              | -0.52  |

75

76 Table S2. Projected absolute percent change to the percent of time spent in different drought and  
 77 wetness categories by the 2050s and 2090s compared to the reference period (1995-2014) using the  
 78 ensemble average under SSP126. Red colours denote larger increases, while green colours denote  
 79 decreases.

| Index | Category         | Eastern Australia |       | Northern Australia |       | Rangelands |        | Southern Australia |       |
|-------|------------------|-------------------|-------|--------------------|-------|------------|--------|--------------------|-------|
|       |                  | 2050s             | 2090s | 2050s              | 2090s | 2050s      | 2090s  | 2050s              | 2090s |
| SPEI  | Extreme drought  | 1.15              | 1.18  | 1.05               | 1.84  | 0.73       | 1.05   | 2.27               | 2.08  |
|       | Severe drought   | 1.46              | 0.8   | 1.37               | 1.97  | 0.85       | 1      | 1.97               | 1.6   |
|       | Moderate drought | 1.19              | 0.86  | 1.81               | 2.3   | 0.75       | 0.97   | 1.96               | 1.55  |
|       | Near normal      | 0.17              | 2.42  | -1.67              | -2.51 | -2.1       | -1.53  | -4.6               | -3.39 |
|       | Moderate wetness | -2.18             | -2.65 | -1.78              | -2.45 | -0.93      | -1.45  | -1.82              | -1.86 |
|       | Severe wetness   | -1.35             | -1.75 | -0.8               | -1.15 | -0.22      | -0.5   | -0.63              | -0.82 |
|       | Extreme wetness  | -0.44             | -0.86 | 0.02               | 0     | 0.92       | 0.47   | 0.85               | 0.84  |
| SPEI  | Extreme drought  | 3.59              | 3.64  | 3.05               | 4.5   | 6.12       | 6.88   | 6.83               | 6.38  |
|       | Severe drought   | 3.43              | 3.38  | 4.12               | 5.17  | 5.75       | 7.07   | 5.84               | 5.65  |
|       | Moderate drought | 3.1               | 3.6   | 4.21               | 4.71  | 3.99       | 5.22   | 4.23               | 4.91  |
|       | Near normal      | -2.68             | -1.14 | -5.21              | -6.85 | -9.47      | -11.13 | -10.42             | -9.57 |
|       | Moderate wetness | -3.97             | -5.09 | -3.66              | -4.6  | -4.22      | -4.9   | -4.28              | -4.81 |
|       | Severe wetness   | -3.05             | -3.63 | -2.32              | -2.78 | -2.42      | -2.95  | -2.61              | -2.86 |
|       | Extreme wetness  | -0.56             | -0.9  | -0.25              | -0.28 | 0.05       | -0.39  | 0.18               | 0.15  |

80

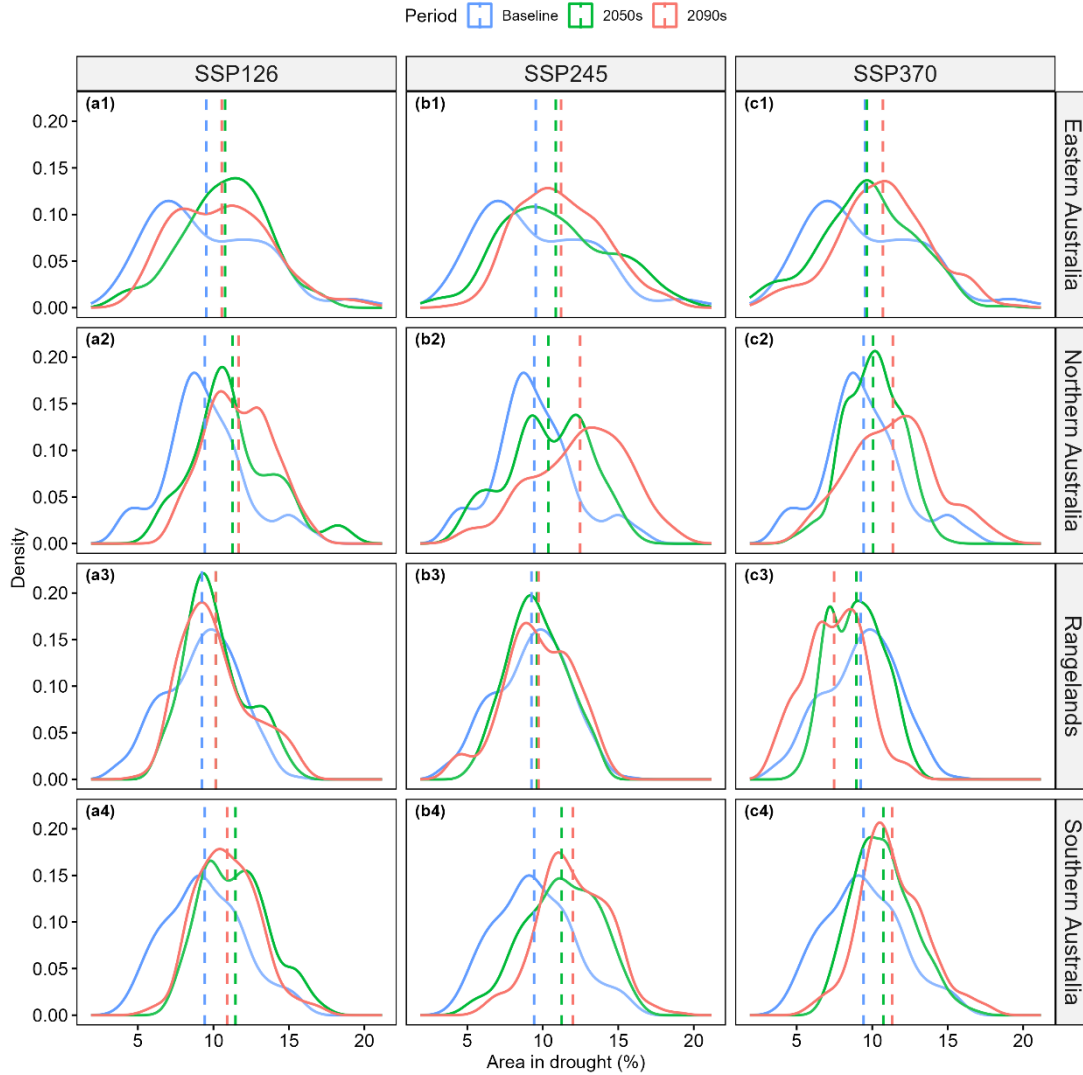

81  
 82 **Figure S12.** Probability density function plot the percent area under moderate drought using SPI values from the  
 83 weighted averaged of the model ensemble for the baseline (1995-2014), 2050s (2041-2060), and 2090s (2081-  
 84 2100). Results are shown for the three SSPs in the four NRM regions considered. Dotted lines show mean values  
 85 and percents show the difference in the overlap between the future and baseline densities.

86

87

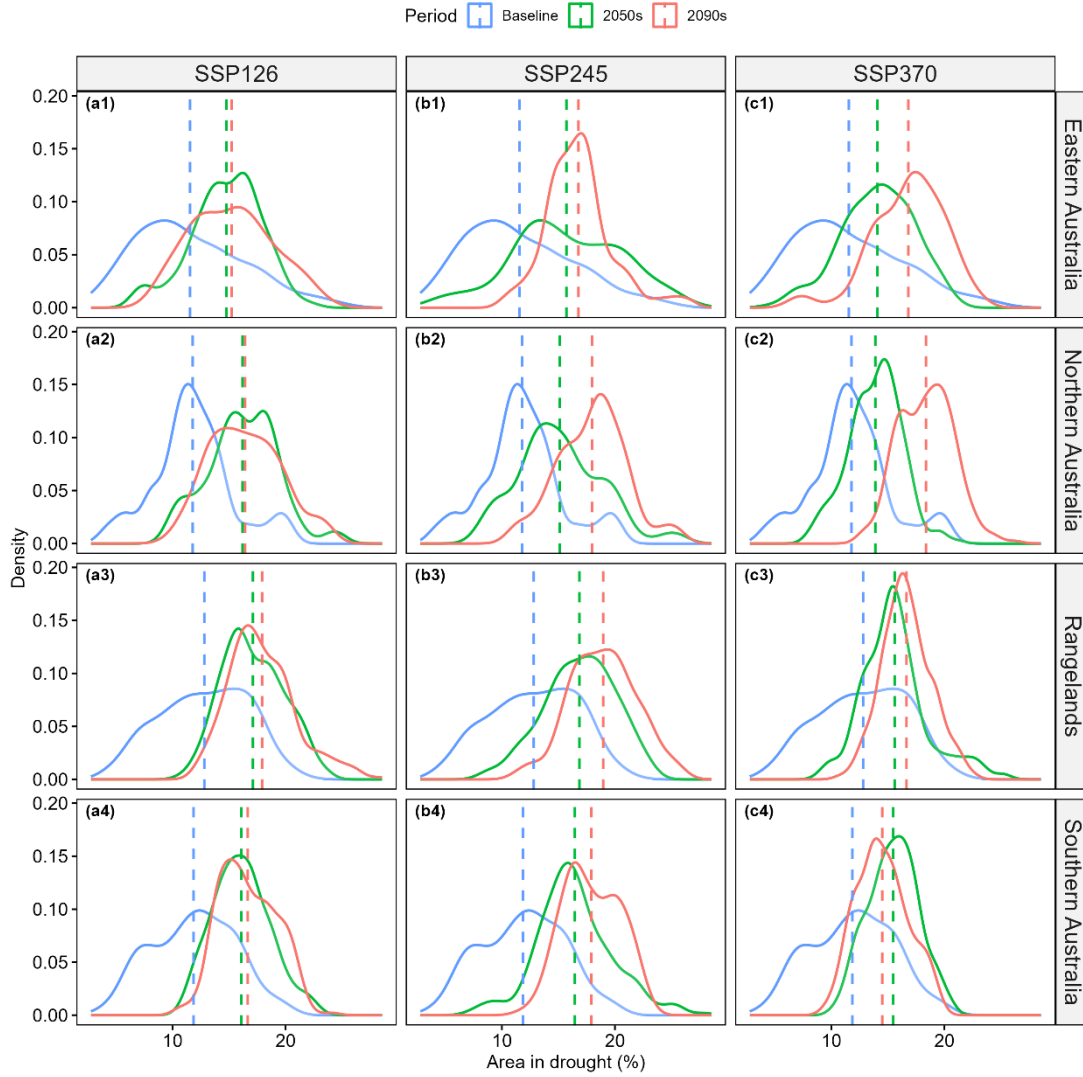

88  
 89 **Figure S13.** Probability density function plot the percent area under moderate drought using SPEI values from the  
 90 weighted averaged of the model ensemble for the baseline (1995-2014), 2050s (2041-2060), and 2090s (2081-  
 91 2100). Results are shown for the three SSPs in the four NRM regions considered. Dotted lines show mean values  
 92 and percents show the difference in the overlap between the future and baseline densities.

93

94 4 Changes to drought metrics

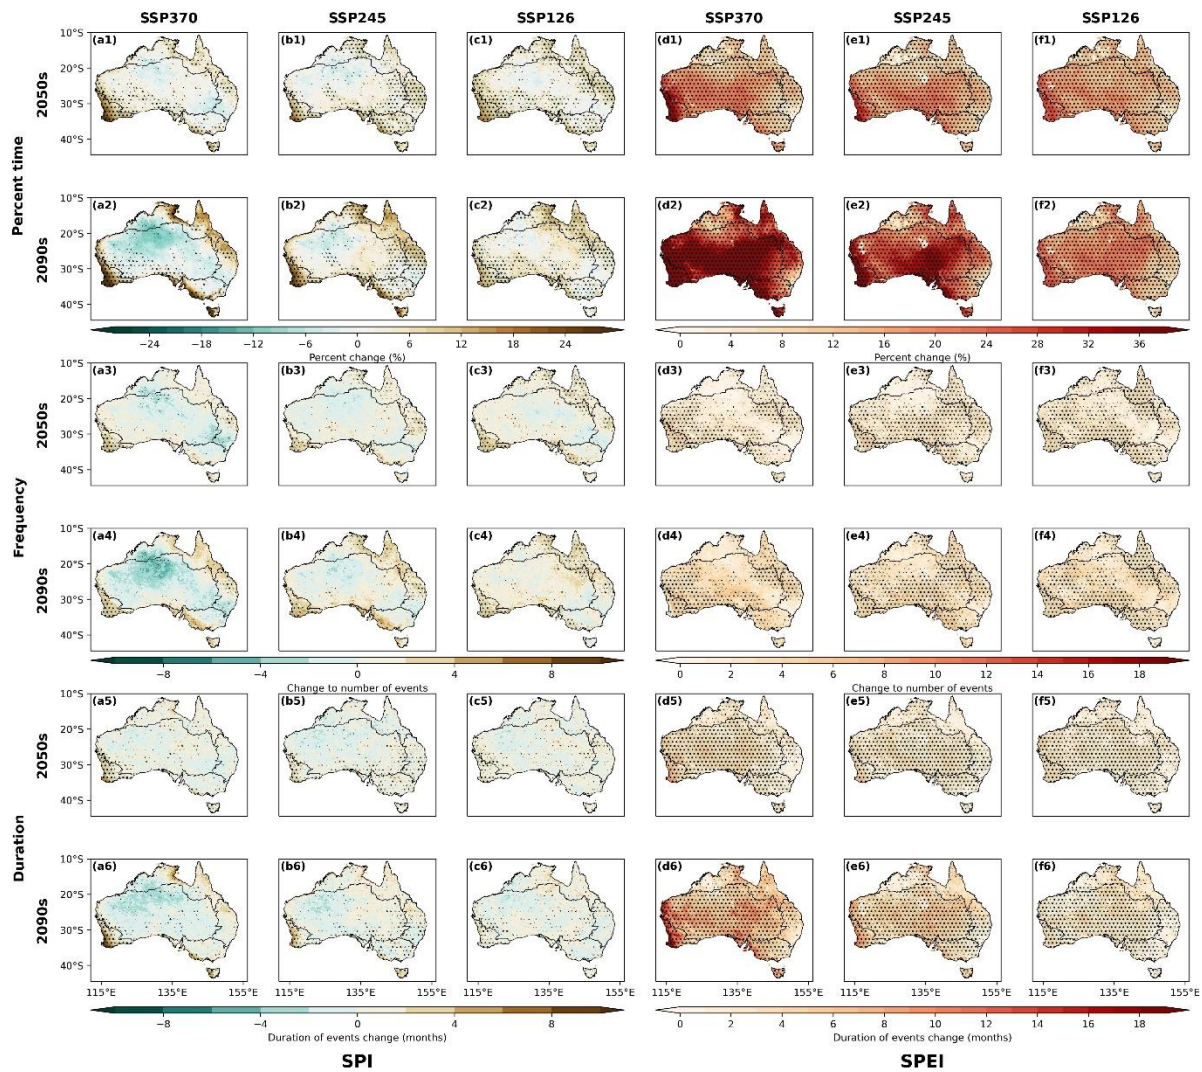

95  
 96 **Figure S14.** Maps showing changes to the percent time (rows 1 to 2), frequency (rows 3 to 4), and duration (rows  
 97 5 to 6) of moderate to extreme droughts according to SPI (columns a, b, and c) and SPEI (column d, e, and f) for  
 98 the 2050s and 2080s relative to the baseline period. Hatching used where there was high inter-model agreement  
 99 on the sign of change (>70%).

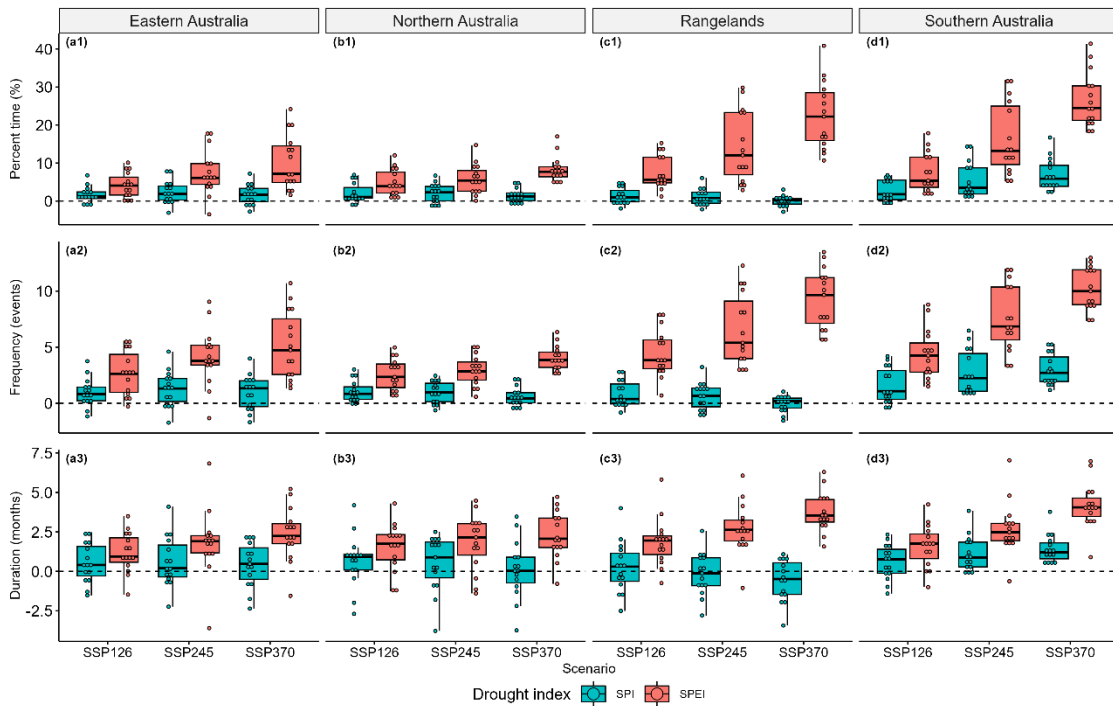

100  
 101 **Figure S15.** Changes to the percent time, frequency, and duration of extreme droughts using SPI and SPEI in the  
 102 2090s compared to the baseline period. The box and whisker plot shows the interquartile range (box), and the  
 103 median (bar), while the whiskers extend from the box to the furthest datapoint within 1.5x the interquartile  
 104 range. Dots show projections for each of the climate models.

105

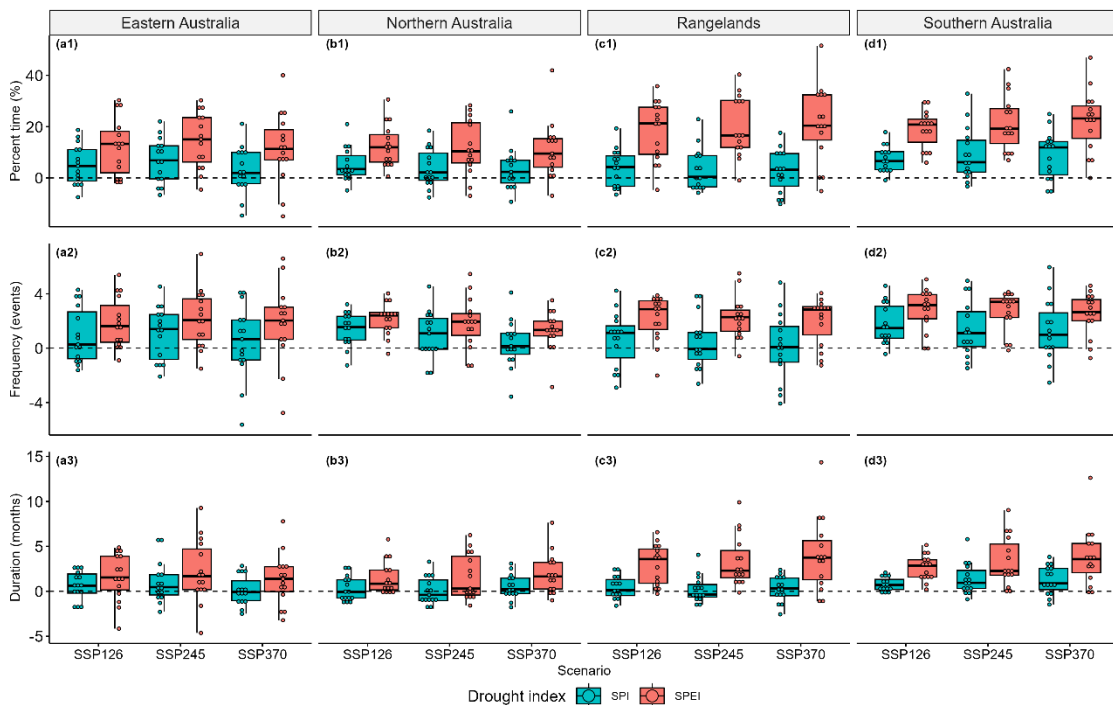

106  
 107 **Figure S16.** Changes to the percent time, frequency, and duration of moderate to extreme droughts using SPI and  
 108 SPEI in the 2050s compared to the baseline period. The box and whisker plot shows the interquartile range (box),  
 109 and the median (bar), while the whiskers extend from the box to the furthest datapoint within 1.5x the interquartile  
 110 range. Dots show projections for each of the climate models.

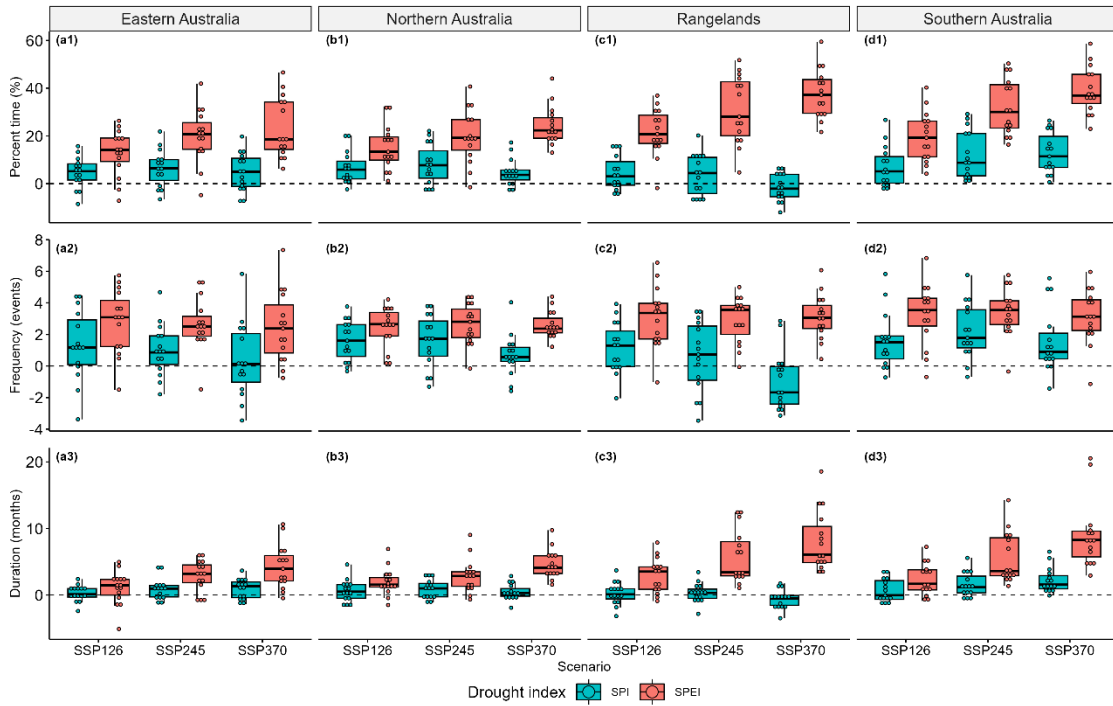

111  
 112  
 113  
 114  
 115

**Figure S17.** Changes to the percent time, frequency, and duration of moderate to extreme droughts using SPI and SPEI in the 2090s compared to the baseline period. The box and whisker plot shows the interquartile range (box), and the median (bar), while the whiskers extend from the box to the furthest datapoint within 1.5x the interquartile range. Dots show projections for each of the climate models.

116
